# Supplementary material for: Hyperglycaemia does not affect antigen-specific activation and cytolytic killing by CD8+ T cells in vivo
Source: Oxford University Press journal article supplement (doi:10.1042/bsr20171079), 2017-08-11
Supplement: bsr20171079_supp1.pdf [file bsr20171079_supp1.pdf]

# Supplementary figure 1

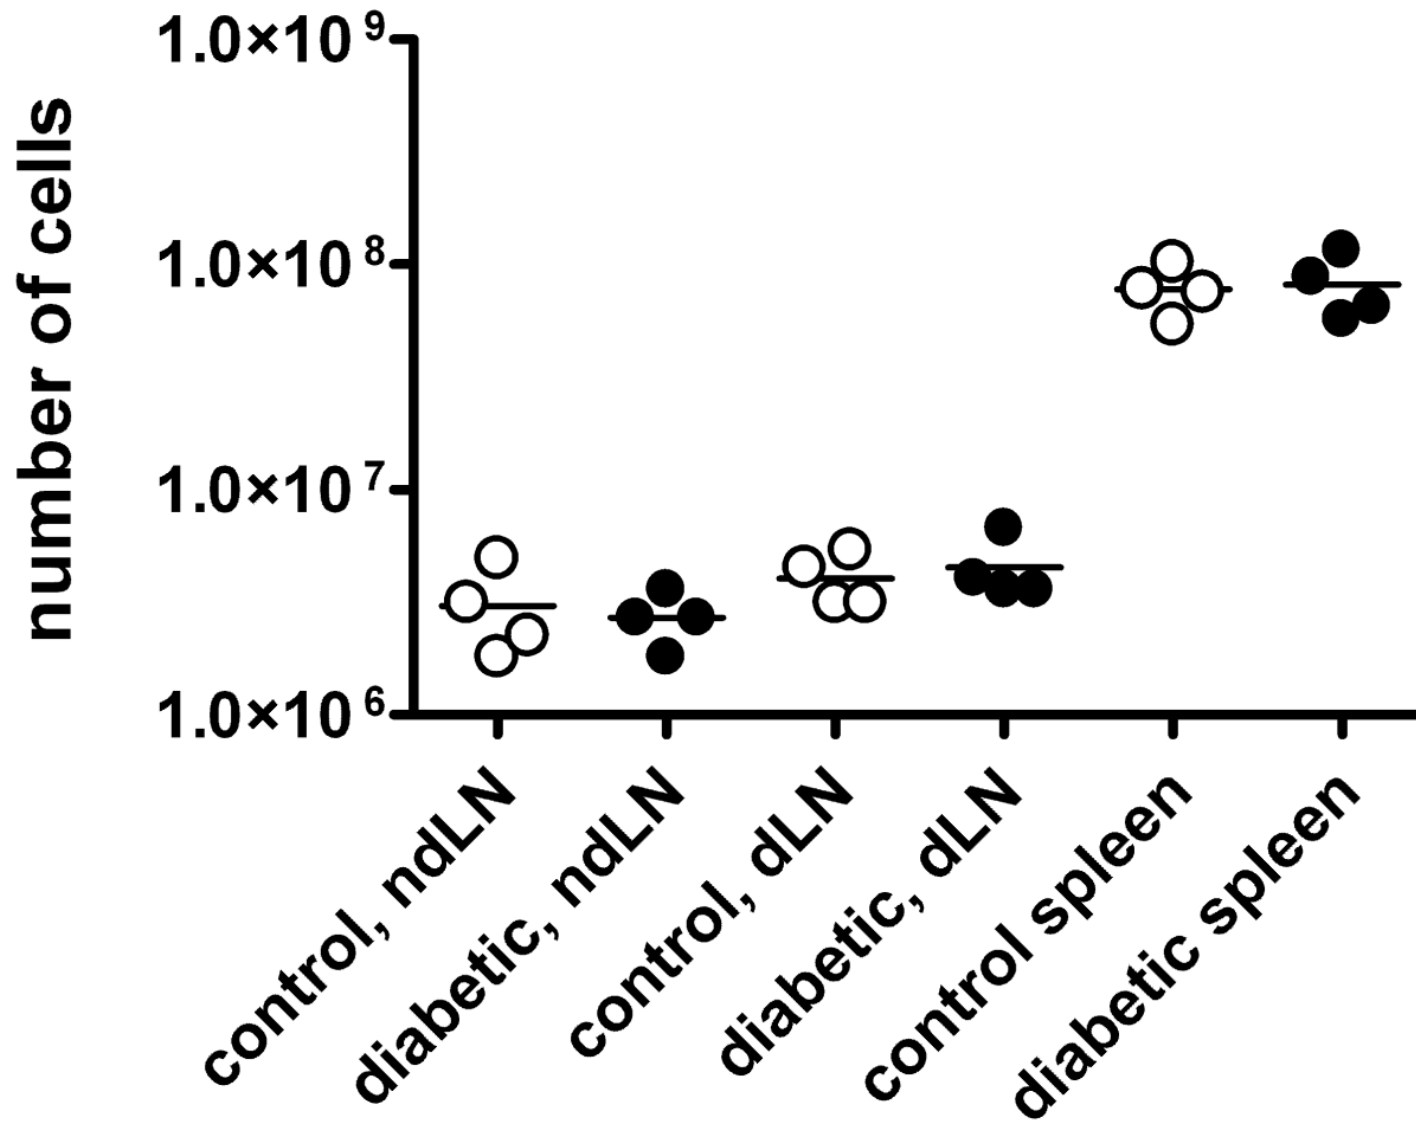

S1. Absolute numbers of cells in secondary lymphoid tissue in male C57BL/6 mice 2 weeks after repeated low dose streptozotocin administration.
